# Supplementary material
Source: Research Square preprint supplement (doi:10.21203/rs.3.rs-9886017/v1)
Supplement: Supplementary file 1 [file ae8b3697b953d212f8558be6.docx]

Supplementary Material

**TITLE PAGE**

**Title:** **Dysregulated Bioactive Lipid Profiles Characterize Inflammation in Philadelphia-Negative Myeloproliferative Neoplasms**

**Short title**:Bioactive lipids profile in myeloproliferative neoplasm

Authors:

Maira da Costa Cacemiro1* (mairacacemiro@hotmail.com)

Juçara Gastaldi Cominal1 (cominal@fcfrp.usp.br)

Carlos Arterio Sorgi3 (carlos.sorgi@usp.br)

Lucia Helena Faccioli1 (faccioli@fcfrp.usp.br)

Felipe Campos de Almeida1 (fcampos13@gmail.com)

Lorena Lobo de Figueiredo-Pontes4 (lorenafgdo@yahoo.com.br)

Luiz Gustavo Gardinassi2 (gustavogardinassi@alumni.usp.br)

Fabíola Attié de Castro1* (castrofa@fcfrp.usp.br)

Table S1 – Demographic data from patients and healthy subjects.

|  | ***CT*** | ***PV*** | ***ET*** | ***PMF*** |
| --- | --- | --- | --- | --- |
| Age average | 57 | 61 | 58 | 60 |
| Male (n) | 4 | 5 | 1 | 5 |
| Female (n) | 4 | 4 | 10 | 3 |
| Total number | 8 | 9 | 11 | 8 |

CT= control (healthy subjects), PV= polycythemia vera, ET= essential thrombocythemia and PMF= primary myelofibrosis

Table S2 – Laboratory data from healthy subjects and ET, PV and PMF patients.

| ***Sample*** | ***Group*** | ***WBC*** | ***RBC*** | ***Hb*** | ***Hct*** | ***Plt*** |
| --- | --- | --- | --- | --- | --- | --- |
| 1 | CT | 3.8 | 5.71 | 16.2 | 47.0 | 244 |
| 2 | CT | 14.9 | 3.82 | 10.7 | 34.0 | 163 |
| 3 | CT | 6.7 | 4.84 | 14.3 | 43.0 | 396 |
| 4 | CT | 7.3 | 5.37 | 14.7 | 44.0 | 173 |
| 5 | CT | 15.0 | 3.50 | 10.3 | 30.0 | 206 |
| 6 | CT | 10.8 | 3.91 | 12.1 | 37.0 | 281 |
| 7 | CT | 6.6 | 4.75 | 14.0 | 41.0 | 205 |
| 8 | CT | 13.9 | 3.00 | 9.5 | 29.0 | 187 |
| 9 | ET | 3.9 | 2.98 | 10.1 | 34.6 | 438 |
| 10 | ET | 7.4 | 5.19 | 22.4 | 64.7 | 469 |
| 11 | ET | 10.5 | 4.15 | 13.6 | 42.0 | 934 |
| 12 | ET | 4.0 | 3.98 | 13.0 | 45.1 | 327 |
| 13 | ET | 7.0 | 4.20 | 13.5 | 41.0 | 435 |
| 14 | ET | 9.0 | 4.17 | 12.0 | 38.0 | 1062 |
| 15 | ET | 7.0 | 4.94 | 11.8 | 41.5 | 722 |
| 16 | ET | 6.9 | 4.34 | 13.9 | 44.4 | 452 |
| 17 | ET | 6.7 | 4.35 | 13.5 | 41.1 | 775 |
| 18 | ET | 9.7 | 4.33 | 12.7 | 40.3 | 998 |
| 19 | PV | 13.8 | 7.83 | 15.7 | 48.0 | 873 |
| 20 | PV | 12.1 | 6.33 | 16.5 | 51.0 | 1037 |
| 21 | PV | 14.0 | 7.46 | 17.1 | 56.5 | 738 |
| 22 | PV | 9.4 | 5.80 | 16.4 | 49.0 | 717 |
| 23 | PV | 6.4 | 4.62 | 15.5 | 48.2 | 451 |
| 24 | PV | 16.1 | 7.32 | 16.5 | 50.0 | 1502 |
| 25 | PV | 21.0 | 6.41 | 17.7 | 55.9 | 591 |
| 26 | PV | 14.2 | 4.04 | 13.2 | 40.1 | 621 |
| 27 | PV | 13.5 | 6.39 | 16.4 | 52.0 | 699 |
| 28 | PMF | 15.3 | 3.92 | 10.7 | 34.0 | 330 |
| 29 | PMF | 2.2 | 3.77 | 11.3 | 35.3 | 71 |
| 30 | PMF | 1.4 | 3.63 | 10.5 | 32.9 | 72 |
| 31 | PMF | 8.3 | 4.22 | 11.2 | 37.0 | 333 |
| 32 | PMF | 2.2 | 2.96 | 8.6 | 26.3 | 71 |
| 33 | PMF | 5.3 | 4.17 | 13.1 | 39.9 | 280 |
| 34 | PMF | 5.6 | 3.96 | 12.7 | 36.0 | 420 |
| 35 | PMF | 4.5 | 3.37 | 12.4 | 37.7 | 279 |

CT= control (healthy subjects), PV= polycythemia vera, ET= essential thrombocythemia, and PMF= primary myelofibrosis. WBC= white blood cells, RBC= red blood cells, Hb= hemoglobin, Hct= hematocrit and Plt= platelets.


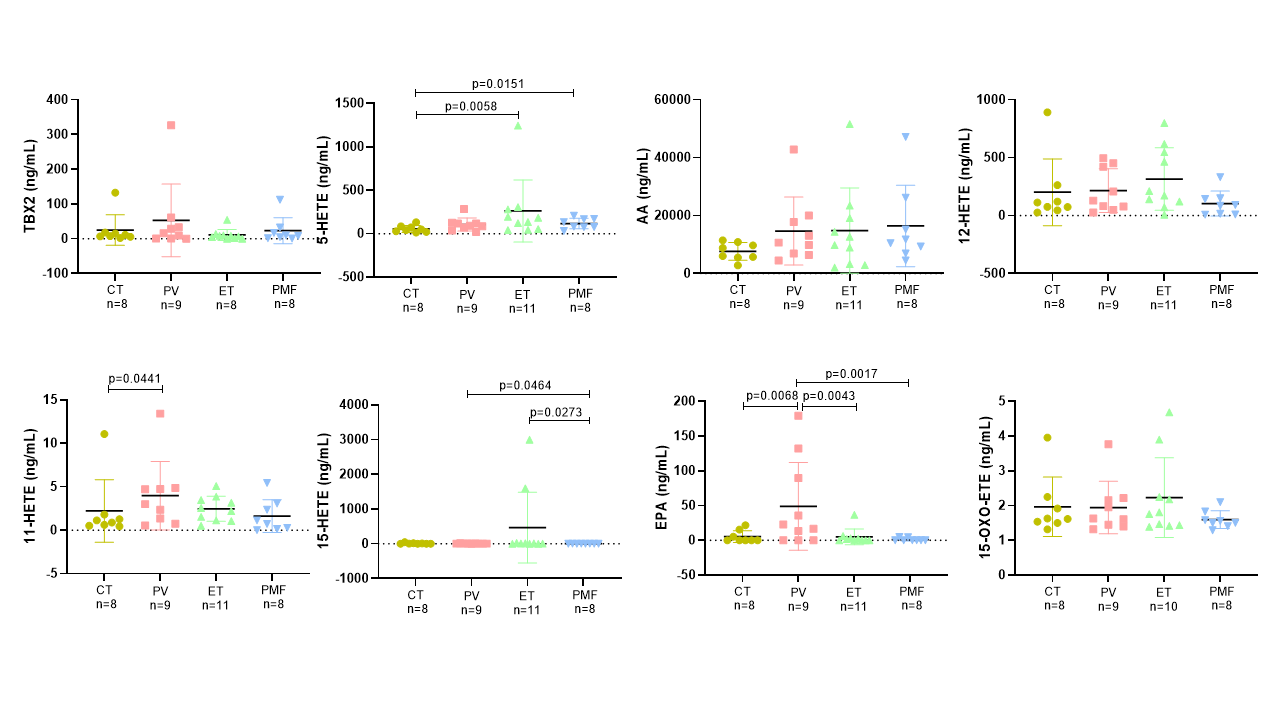


Figure S1 – Eicosanoids levels in bone marrow plasma from myeloproliferative neoplasms patients and healthy subjects (controls). Differential production of TBX2, 5-HETE, AA, 12-HETE, 11-HETE, 15-HETE, EPA and 15-OXO-ETE among MPN patients and control groups. Statistical differences are represented in each graph; p < 0.05; Mann-Whitney test.

Figure S2 - Correlation between eicosanoids levels and hematological parameters in essential thrombocythemia patients. The figure shows r value for each comparison in Pearson’s correlation test. WBC= white blood cells, RBC= red blood cells, Hb= hemoglobin, Hct= hematocrit and Plt= platelets.

Figure S3 - Correlation between eicosanoids levels and hematological parameters in polycythemia vera patients. The figure shows r value for each comparison in Pearson’s correlation test. WBC= white blood cells, RBC= red blood cells, Hb= hemoglobin, Hct= hematocrit and Plt= platelets.

Figure S4 - Correlation between eicosanoids levels and hematological parameters in primary myelofibrosis. The figure shows r value for each comparison in Pearson’s correlation test. WBC= white blood cells, RBC= red blood cells, Hb= hemoglobin, Hct= hematocrit and Plt= platelets.
